# Supplementary material for: Declining Levels of Neutralizing Antibodies Against SARS-CoV-2 in Convalescent COVID-19 Patients One Year Post Symptom Onset
Source: PubMed Central journal article supplement (PMC8242354; doi:10.3389/fimmu.2021.708523), 2021-06-16
Supplement: DataSheet_1.pdf [file DataSheet_1.pdf]

## Supplementary Material

**Table S1. Sensitivity and Specificity of CLIA assays for Diagnosis of SARS-CoV-2 specific antibodies.**

|                  | Sensitivity |          |        | Specificity |          |         |
|------------------|-------------|----------|--------|-------------|----------|---------|
|                  | Negative    | Positive | %      | Negative    | Positive | %       |
| <b>Total IgM</b> | 9           | 136      | 93.80% | 95          | 1        | 98.96%  |
| Anti-S IgM       | 28          | 117      | 80.69% | 95          | 1        | 98.96%  |
| Anti-N IgM       | 63          | 82       | 56.55% | 96          | 0        | 100.00% |
| <b>Total IgG</b> | 4           | 141      | 97.24% | 94          | 2        | 97.92%  |
| Anti-S IgG       | 10          | 135      | 93.10% | 95          | 1        | 98.96%  |
| Anti-N IgG       | 6           | 139      | 95.86% | 95          | 1        | 98.96%  |

Abbreviations: CLIA, capture chemiluminescence immunoassays; The diagnostic value of sensitivity was evaluated in 96 healthy individuals without COVID-19. The diagnostic value of specificity was evaluated in 145 confirmed COVID-19 patients, with disease course  $\geq 11$  days and  $< 30$  days.

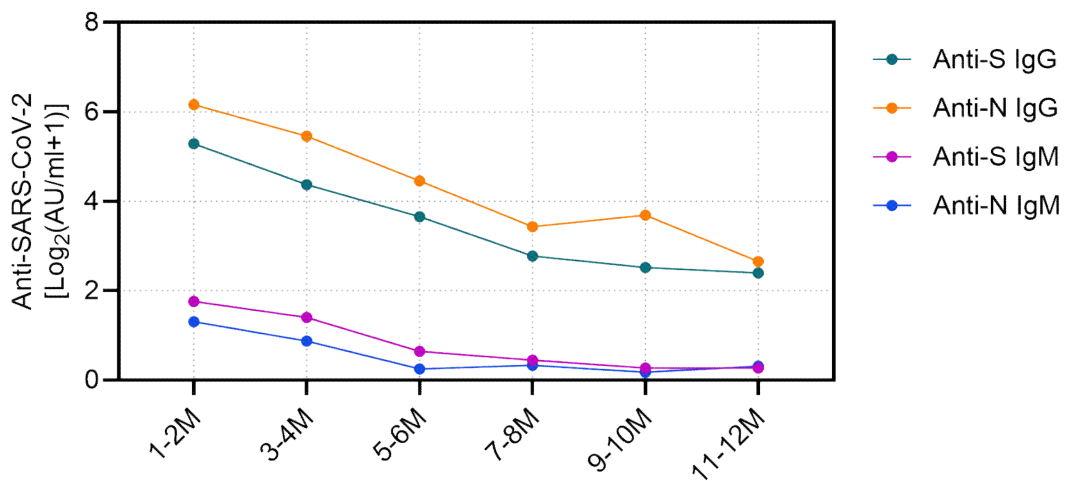

**Figure S1. A line chart showing the declining trend of antibodies.** A total of 162 samples from 76 patients against different SARS-CoV-2 proteins in longitudinal time points. The dots with different colors represent antibody titers of IgM and IgG recognizing the nucleocapsid (N) protein or the receptor binding domain (RBD) of the spike protein (S).
